# Supplementary material
Source: publisher figshare collection journal article supplement (https://frontiersin.figshare.com/ndownloader/files/35109124)
Supplement: Supplementary file [file 35109124]

# Supplementary Material

## 1 SUPPLEMENTARY TABLES AND FIGURES

### 1.1 Tables

**Table S1.** Description of simulated and real sequencing data sets. See the excel file: *Supplementary Table S1.xlsx*

|                        | CPU time (h) | peak memory usage (GB) |
|------------------------|--------------|------------------------|
| <i>Low complexity</i>  |              |                        |
| MetaBooster            | 411.6        | 81.2                   |
| MetaBooster-HiFi       | 330.6        | 81.2                   |
| Canu                   | 69.5         | 10.8                   |
| metaFlye               | 10.1         | 20.4                   |
| <i>High complexity</i> |              |                        |
| MetaBooster            | 7066.8       | 75.5                   |
| MetaBooster-HiFi       | 5331.3       | 75.5                   |
| Canu                   | 547.0        | 11.8                   |
| metaFlye               | 107.6        | 75.6                   |

**Table S2.** Runtime and memory usage for metagenome assembly of simulated sequencing data.

|                                  | CPU time (h) | peak memory usage (GB) |
|----------------------------------|--------------|------------------------|
| <i>NWC data</i>                  |              |                        |
| MetaBooster                      | 661.3        | 69.9                   |
| MetaBooster-HiFi                 | 593.9        | 69.9                   |
| Canu                             | 41.1         | 5.0                    |
| metaFlye                         | 6.9          | 18.4                   |
| <i>Microbial 10-plex</i>         |              |                        |
| MetaBooster                      | 389.2        | 33.2                   |
| MetaBooster-HiFi                 | 335.4        | 33.2                   |
| Canu                             | 63.0         | 5.2                    |
| metaFlye                         | 7.9          | 19.5                   |
| <i>Real human gut microbiome</i> |              |                        |
| MetaBooster                      | 12224.8      | 31.2                   |
| MetaBooster-HiFi                 | 7812.6       | 22.6                   |
| Canu                             | 2143.4       | 10.8                   |
| metaFlye                         | 57.5         | 61.4                   |

**Table S3.** Runtime and memory usage for metagenome assembly of real sequencing data.

### 1.2 Figures

| Error corrector | Assembler        | #Contigs | Genome fraction (%) | N50 (bp) | NGA50 (bp) | Error rate (%) | N(%)  | # Misassemblies | Duplication ratio | Assembly size(Mbp) |
|-----------------|------------------|----------|---------------------|----------|------------|----------------|-------|-----------------|-------------------|--------------------|
| -               | MetaBooster-HiFi | 217      | 98.2                | 3809619  | 3809619    | 0.037          | 0.000 | 14              | 1.04              | 65.0               |
| VeChat2         | HiCanu           | 462      | 91.2                | 1063634  | 1063634    | 0.065          | 0.000 | 6               | 1.09              | 62.9               |
| CanuCorr2       | HiCanu           | 312      | 93.9                | 1557876  | 1013452    | 0.089          | 0.000 | 30              | 1.06              | 63.1               |
| VeChat          | HiCanu           | 423      | 89.2                | 1488621  | 1377622    | 0.018          | 0.000 | 4               | 1.03              | 58.2               |
| Canu            | HiCanu           | 429      | 91.9                | 790872   | 457182     | 0.153          | 0.000 | 33              | 1.06              | 62.2               |
| -               | MetaBooster      | 226      | 93.9                | 1139900  | 991303     | 0.060          | 0.000 | 44              | 1.03              | 61.8               |
| VeChat2         | Canu             | 243      | 93.0                | 1077253  | 603213     | 0.065          | 0.000 | 39              | 1.02              | 60.8               |
| CanuCorr2       | Canu             | 320      | 92.1                | 736249   | 414453     | 0.146          | 0.000 | 59              | 1.05              | 62.1               |
| VeChat          | Canu             | 283      | 91.4                | 787056   | 483553     | 0.057          | 0.000 | 37              | 1.03              | 60.0               |
| -               | Canu             | 336      | 91.1                | 670907   | 382472     | 0.149          | 0.000 | 65              | 1.05              | 61.5               |

**Table S4.** Assembly performance of the simulated low-complexity dataset using different error corrector combinations. MetaBooster and MetaBooster-HiFi actually use the error corrector combination 'VeChat+Canu error correction'. To demonstrate the power of this combination, we ran 'VeChat+VeChat' (named 'VeChat2') and 'Canu error correction+Canu error correction' (named 'CanuCorr2') for comparison. A single 'HiCanu' was not run because it was designed to only assemble PacBio HiFi reads. The reference size of this low-complexity data is about 63.3 Mbp.

| Strain ID    | Abundance(%) | Canu    | MetaBooster | MetaBooster-HiFi |
|--------------|--------------|---------|-------------|------------------|
| 1053692_0seq | 3.1212       | 1840.28 | 1125.85     | 395.45           |
| 562971_1seq  | 3.6807       | 807.87  | 692.48      | 616.58           |
| 1172205_1seq | 4.7154       | 5.92    | 5.43        | 6.45             |
| 267608_0seq  | 4.8615       | 228.79  | 86.84       | 20.04            |
| 402880_0seq  | 4.9417       | 877.59  | 13.33       | 14.38            |
| 1167634_0seq | 5.8959       | 209.01  | 259.96      | 198.55           |
| 305_16seq    | 5.9675       | 356.66  | 474.63      | 24.29            |
| 305_4seq     | 7.0385       | 499.7   | 348.57      | 19.47            |
| 258594_0seq  | 7.2311       | 2.97    | 0.26        | 0.58             |
| 267377_0seq  | 7.6586       | 1889.09 | 294.84      | 1.01             |
| 652103_0seq  | 12.0003      | 0.11    | 0.28        | 0.28             |
| 1038921_0seq | 13.0802      | 1741.62 | 13.21       | 2.53             |
| 86192_0seq   | 19.8074      | 501     | 11.38       | 1.19             |

**Table S5.** Error rate per strain of assemblies generated from the simulated low-complexity dataset. The values in 3-5 columns represent the number of errors (mismatches+indels) per 100kbp in the assembly. Rows are ordered by the abundance.

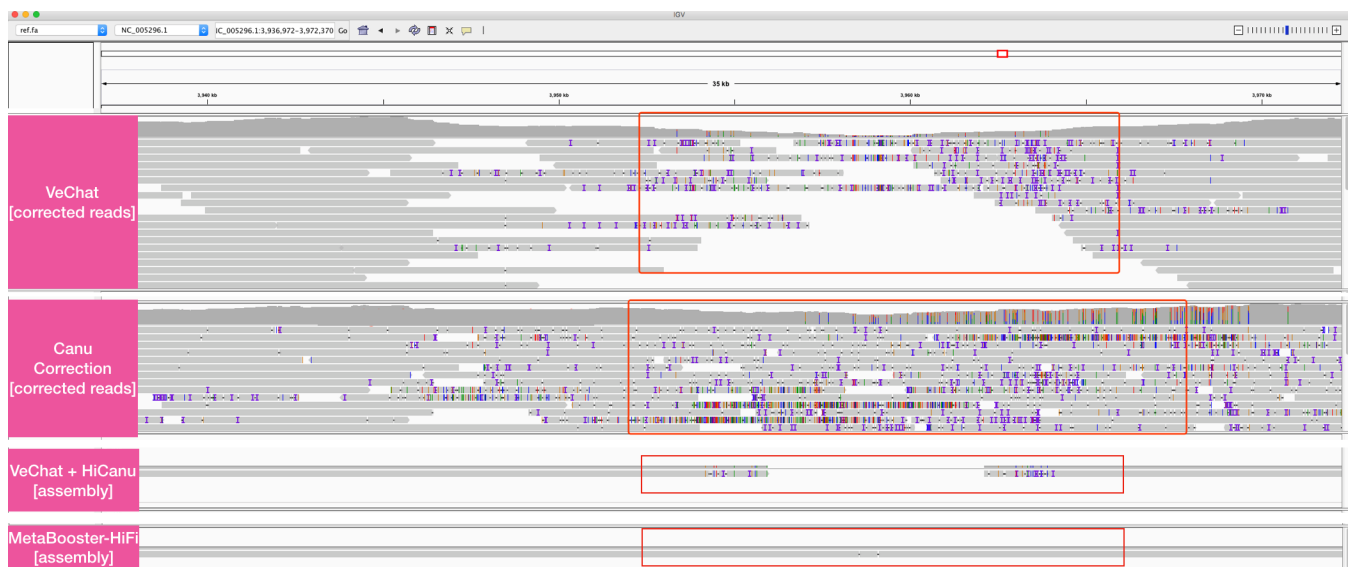

**Figure S1.** IGV visualization. The red box represents a region showing high sequence divergence (>20%) between different strains in the simulated low-complexity dataset. The top two panels show the alignment of corrected reads (from VeChat or Canu correction) to the reference, whereas the bottom two panels show the alignment of assemblies (from VeChat+HiCanu or MetaBooster-HiFi) to the reference.

## 2 COMMAND AND VERSION OF TOOLS

- PBSIM2

```
pbsim2 --accuracy-mean 0.9 --hmm_model P6C4.model $ref # PacBio CLR
```

- Canu v2.1.1

#simulated:

```
canu genomeSize=$genomesize rawErrorRate=0.2 -pacbio $raw_read
```

#real:

```
canu genomeSize=$genomesize -pacbio $raw_read
```

```
canu genomeSize=$genomesize -nanopore $raw_read
```

Note that genomeSize is set as the corresponding reference size of each dataset, see captions of Table1 and Table2 in the main text for details.

- Flye v2.8.2-b1689

```
flye --meta --nano-raw $read -t 48
```

```
flye --meta --pacbio-raw $read -t 48
```

- Strainberry v1.1-a90d3b3 ; minimap2 v2.17-r941 ; samtools v1.12

```
minimap2 -ax map-pb -t 48 cns.assembly.fasta $read |
```

```
samtools sort - @${threads} > alignment.sorted.bam
```

```
samtools faidx cns.assembly.fasta
```

```
samtools index alignment.sorted.bam
```

```
strainberry -r cns.assembly.fasta -b alignment.sorted.bam -o out -c 48
```

- MetaQUAST v5.1.0rc1

```
metaquast.py -r $ref --min-contig 500 -o out --unique-mapping $assembly
```

- MetaBooster

#simulated data (low complexity)

```
metagenome-asm -i reads.fq -g 63m -o out
```

```
-p pb --base -t 48 -m MetaBooster
```

#simulated data (medium complexity)

```
metagenome-asm -i reads.fq -g 374m -o out
```

```
-p pb --base -t 48 -m MetaBooster --split --split-size 100000
```

#real data (Mock community I: natural whey starter culture data)

```
metagenome-asm -i reads.fq -g 13m -o out -p pb --base -t 48
```

```
-m MetaBooster --split --split-size 70000 --min-identity-cns 0.98
```

#real data (Mock community II: Microbial 10-plex data)

```
metagenome-asm -i reads.fq -g 37m -o out -p pb  
--base -t 48 -m MetaBooster --split --split-size 70000  
--min-identity-cns 0.98 --scrub
```

#real data (Real human gut microbiome data. Results were generated using the HPC version of VeChat in our manuscript.)

```
metagenome-asm -i reads.fq -g 200m -o out -p ont  
--base -t 48 -m MetaBooster --split --split-size 200000  
--min-identity-cns 0.98 --scrub
```

- MetaBooster-HiFi

The commands are the same with those used in MetaBooster, except using `-m MetaBooster-HiFi`
